# Supplementary material for: Efficient tailoring of the surface of upconversion nanoparticles via surface-initiated cationic ring-opening polymerization
Source: Royal Society of Chemistry journal article supplement (doi:10.1039/c5ra18922e), 2015-01-01
Supplement: c5ra18922e1.pdf [file c5ra18922e1.pdf]

## Electronic Supplementary Information

### **Efficient tailoring the surface of upconversion nanoparticle *via* surface-initiated cationic ring-opening polymerization**

Benzhao He, and Li Zhou\*

*Guangxi Ministry-Province Jointly-Constructed Cultivation Base for State Key Laboratory of Processing for Nonferrous Metal and Featured Materials, Key Laboratory of New Processing Technology for Nonferrous Metal and Materials (Ministry of Education), and College of Material Science and Engineering, Guilin University of Technology, Guilin 541004, P. R. China*

**Fig. S1**

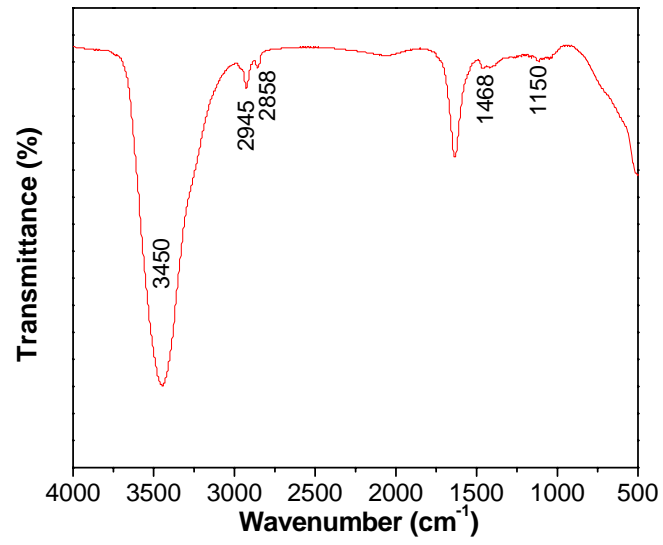

**Fig. S1.** FTIR spectrum of UCNP-OH.

**Fig. S2**

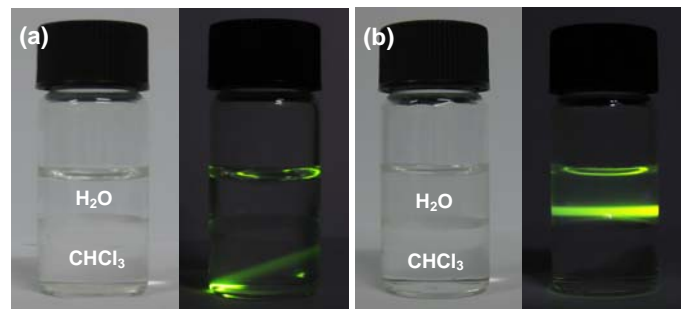

**Fig. S2.** Photographs of UCNP-g-PCL2 (a) and UCNP-g-HPG (b) in the mixture of water and chloroform under daylight (left) and 980 nm laser illumination (right).

**Fig. S3**

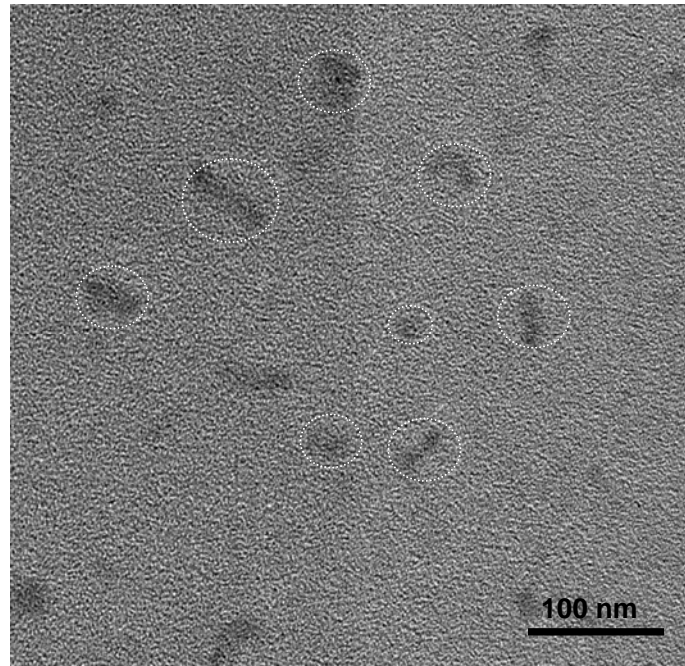

**Fig. S3.** Representative TEM image of UCNP-*g*-PCL/PMMA film.

**Fig. S4**

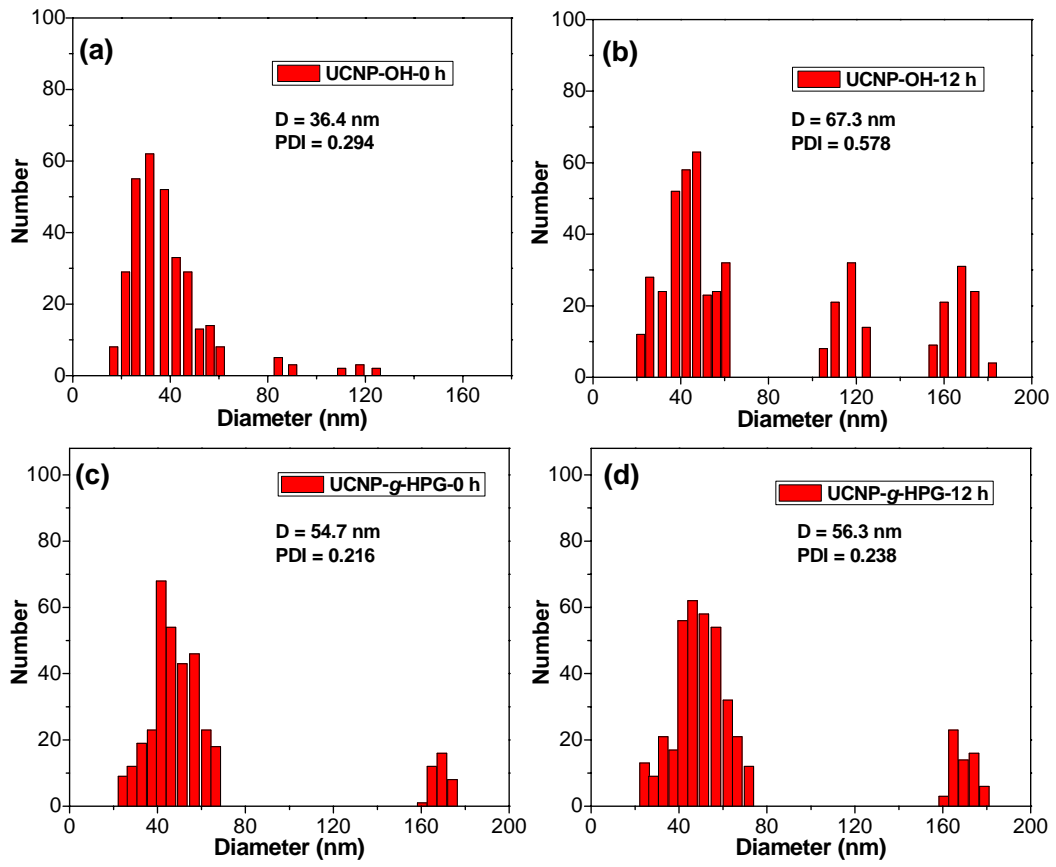

**Fig. S4.** Hydrodynamic radius distribution of freshly prepared aqueous dispersion of UCNP-OH (a) and UCNP-g-HPG (c) at a concentration of 0.1 mg/mL. Hydrodynamic radius distribution of aqueous dispersion of UCNP-OH (b) and UCNP-g-HPG (d) after 12 h.

**Fig. S5**

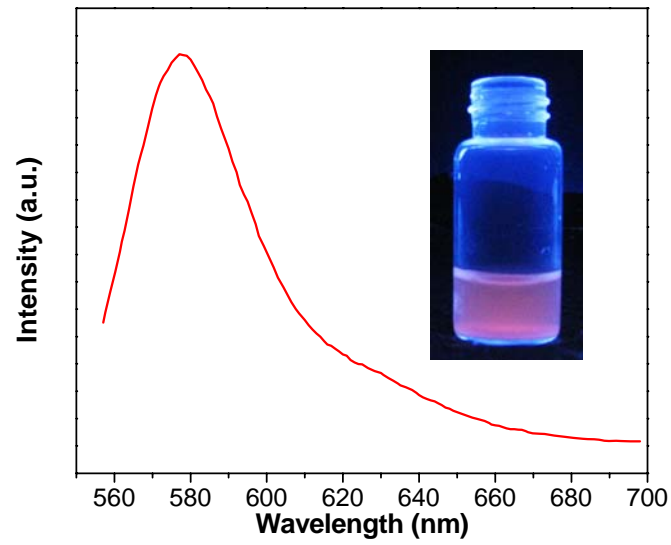

**Fig. S5.** Emission spectrum of UCNP-*g*-HPG-RB in aqueous solution ( $\lambda_{\text{ex}} = 545$  nm). Inset: photograph of UCNP-*g*-HPG-RB (0.5 mg/mL) in water under 365 nm UV-light illumination.

**Fig. S6**

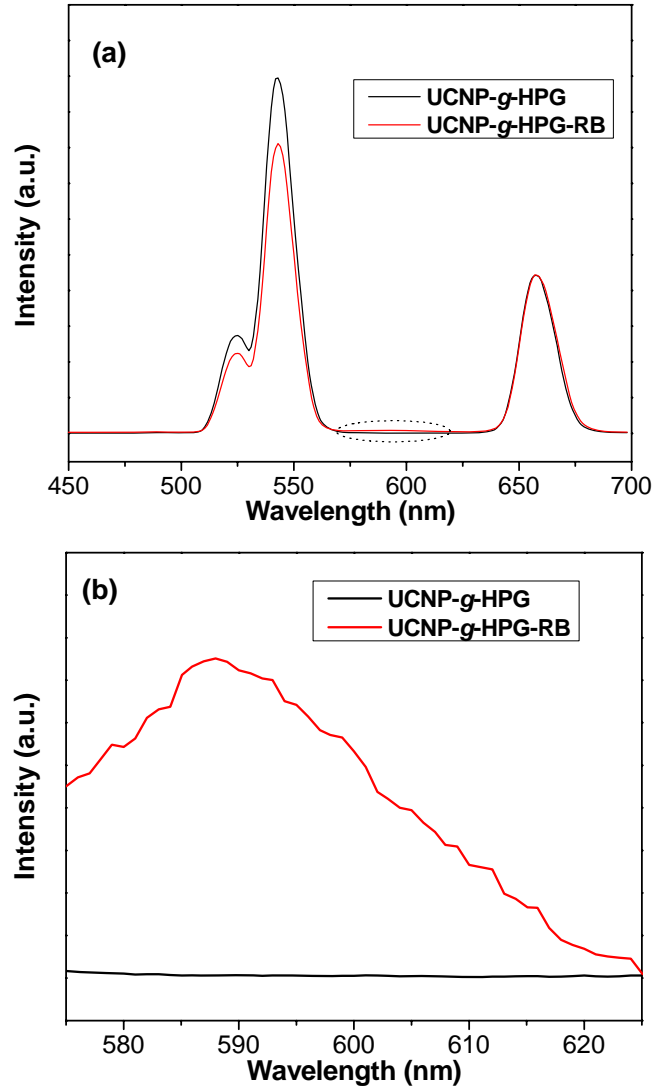

**Fig. S6.** (a) Normalized upconversion emission spectra ( $\lambda_{\text{ex}} = 980$  nm) of UCNP-g-HPG and UCNP-g-HPG-RB. (b) Upconversion emission spectra ( $\lambda_{\text{ex}} = 980$  nm) of UCNP-g-HPG and UCNP-g-HPG-RB.
